# Supplementary material for: CD200 is overexpressed in the pancreatic tumor microenvironment and predictive of overall survival
Source: PubMed Central journal article supplement (PMC11018596; doi:10.1007/s00262-024-03678-6), 2024-04-15
Supplement: 262_2024_3678_MOESM1_ESM.pdf [file 262_2024_3678_MOESM1_ESM.pdf]

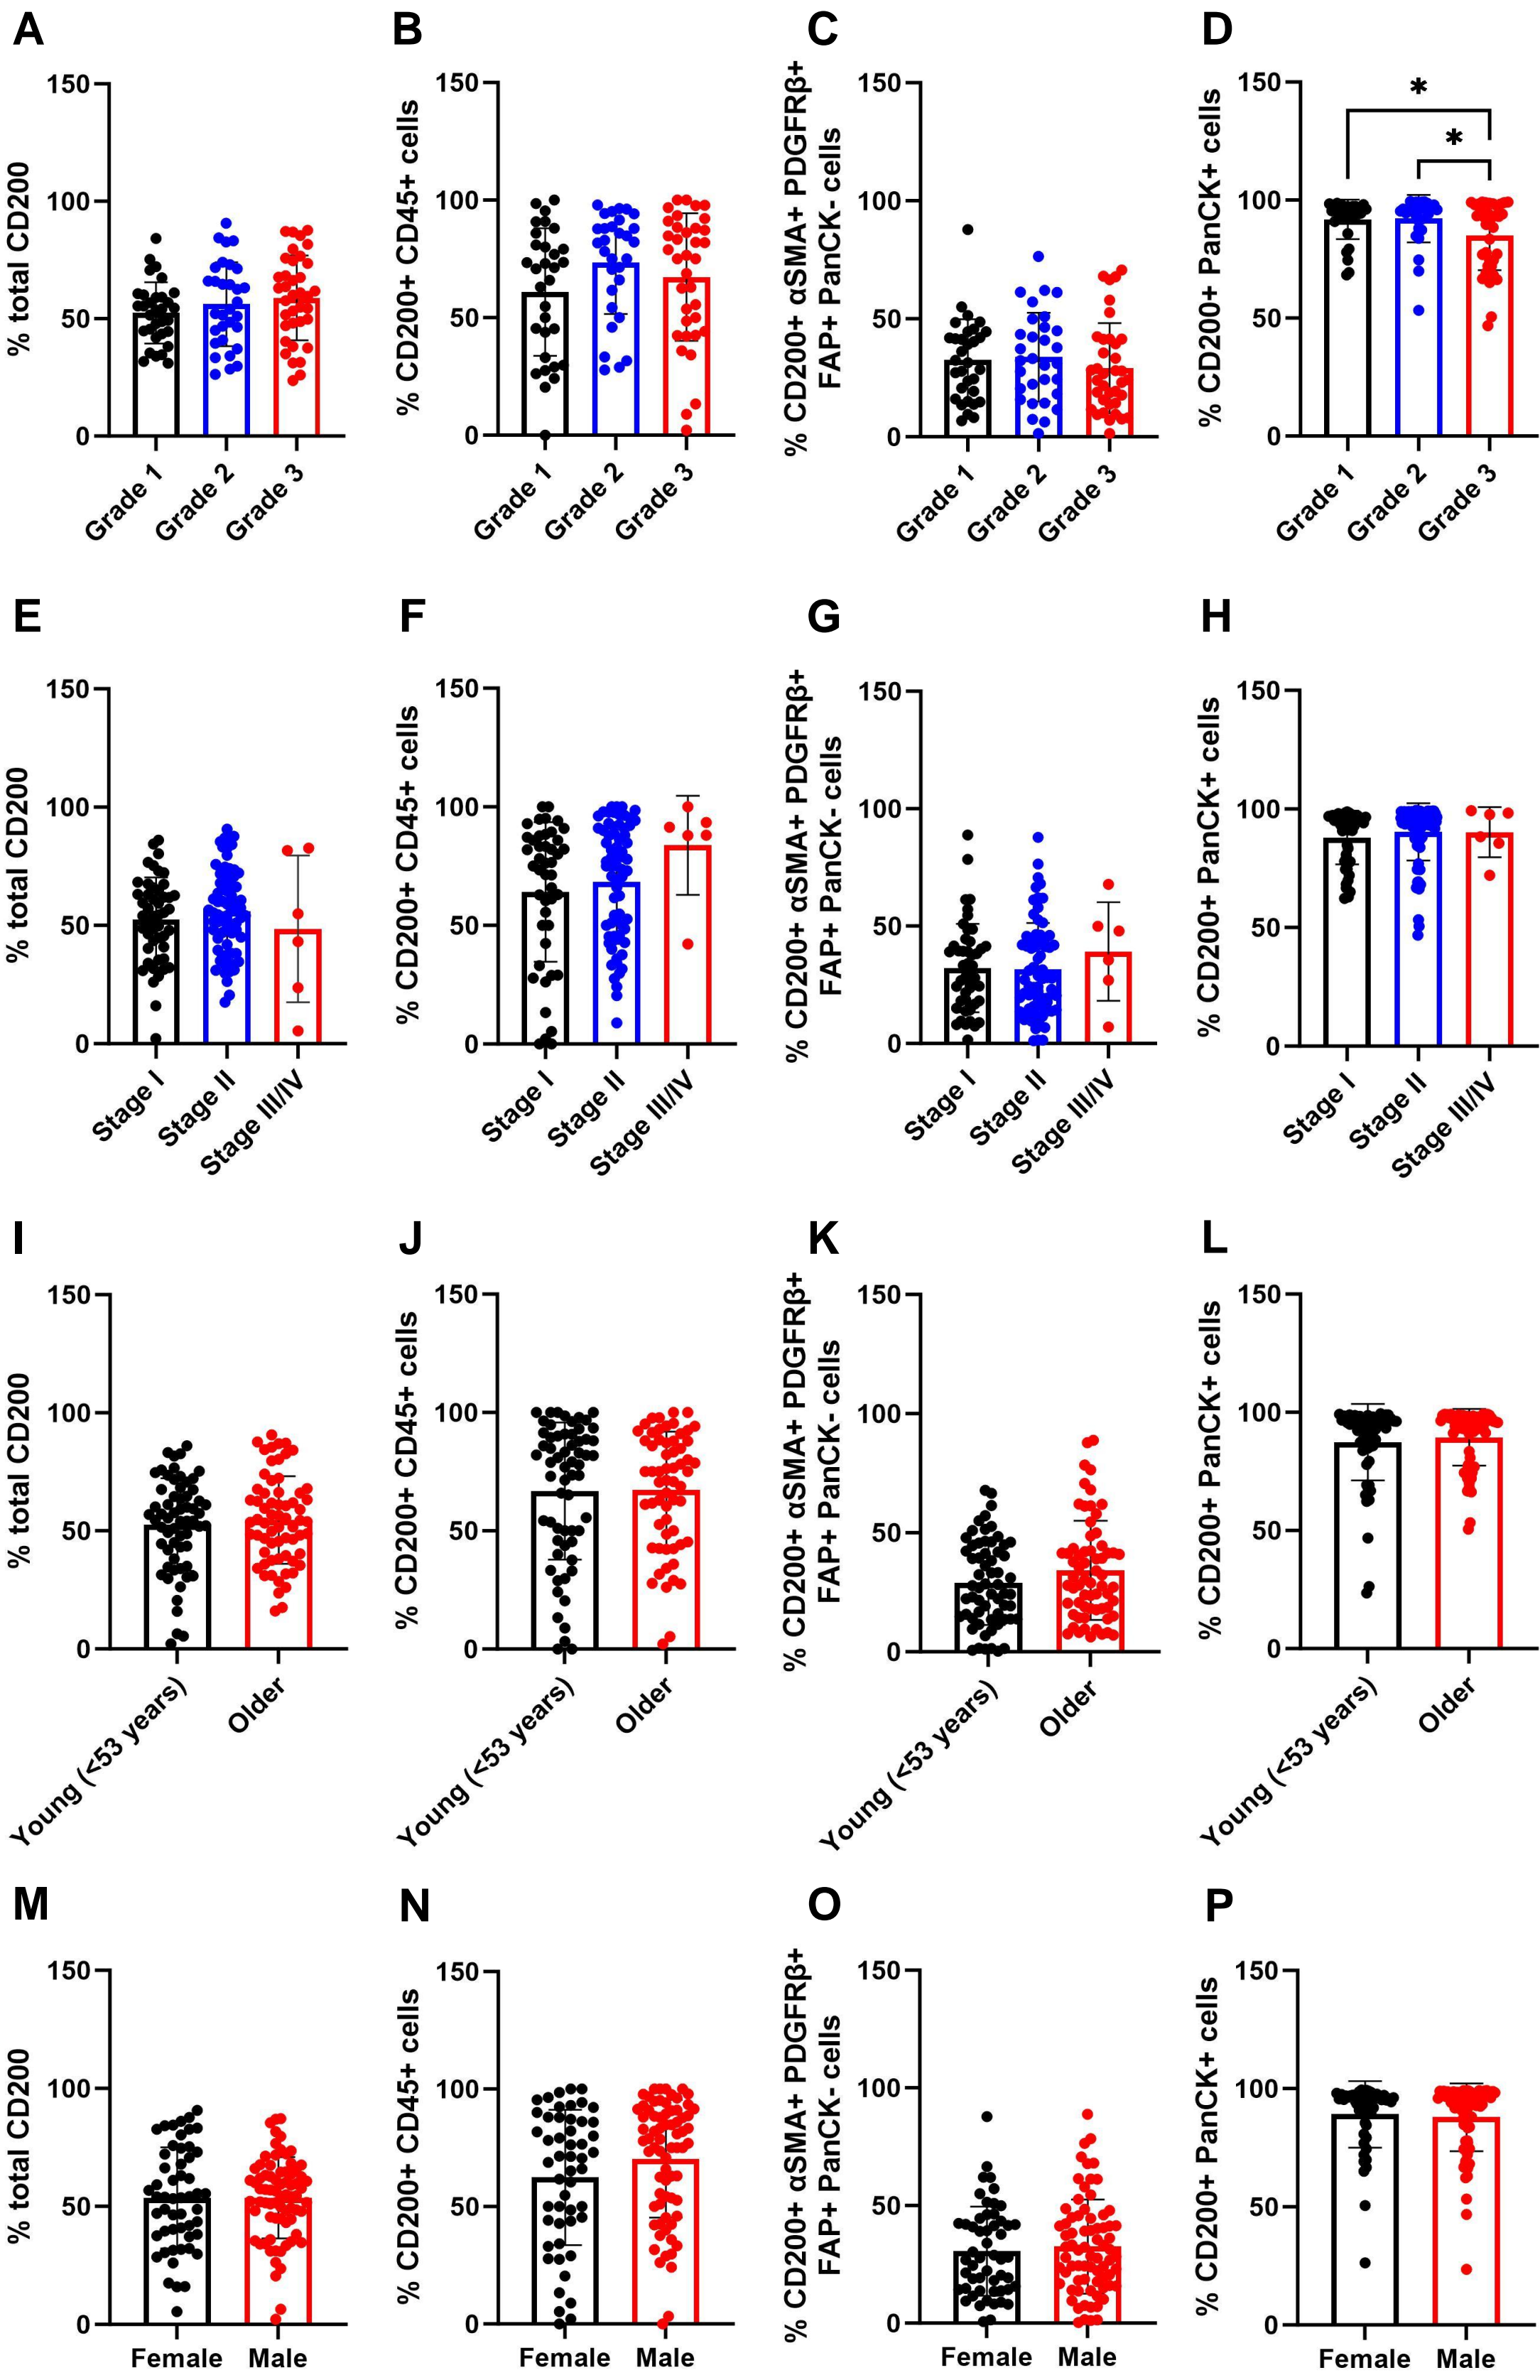

**Supplemental Figure 1: CD200 expression in the pancreatic tumor microenvironment is not dependent on pathology grade or cancer stage.** Tissue microarrays were stained for tumor (PanCK), immune (CD45), stroma (FAP, PDGFR $\beta$ ,  $\alpha$ SMA), and CD200. CD200 expression was quantified as **A** % total CD200, **B** % CD200+ CD45+ immune cells, **C** % CD200+  $\alpha$ SMA+ PDGFR $\beta$ + FAP+ PanCK- stromal cells, and **D** % CD200+ PanCK+ tumor cells in patients with grade 1 (n = 32), grade 2 (n = 31), and grade 3 (n = 37) tumors. CD200 expression was quantified as **E** % total CD200, **F** % CD200+ CD45+ immune cells, **G** % CD200+  $\alpha$ SMA+ PDGFR $\beta$ + FAP+ PanCK- stromal cells, and **H** % CD200+ PanCK+ tumor cells in patients with stage I (n = 48), stage II (n = 71), and stage III/IV (n = 6) disease. CD200 expression was quantified as **I** % total CD200, **J** % CD200+ CD45+ immune cells, **K** % CD200+  $\alpha$ SMA+ PDGFR $\beta$ + FAP+ PanCK- stromal cells, and **L** % CD200+ PanCK+ tumor cells in patients younger than the median age, 53 years, (n = 62) and patients older than the median (n = 65). CD200 expression was quantified as **M** % total CD200, **N** % CD200+ CD45+ immune cells, **O** % CD200+  $\alpha$ SMA+ PDGFR $\beta$ + FAP+ PanCK- stromal cells, and **P** % CD200+ PanCK+ tumor cells in female (n = 53) and male (n = 74) patients. Means  $\pm$  STD, \* = p < 0.05

**A**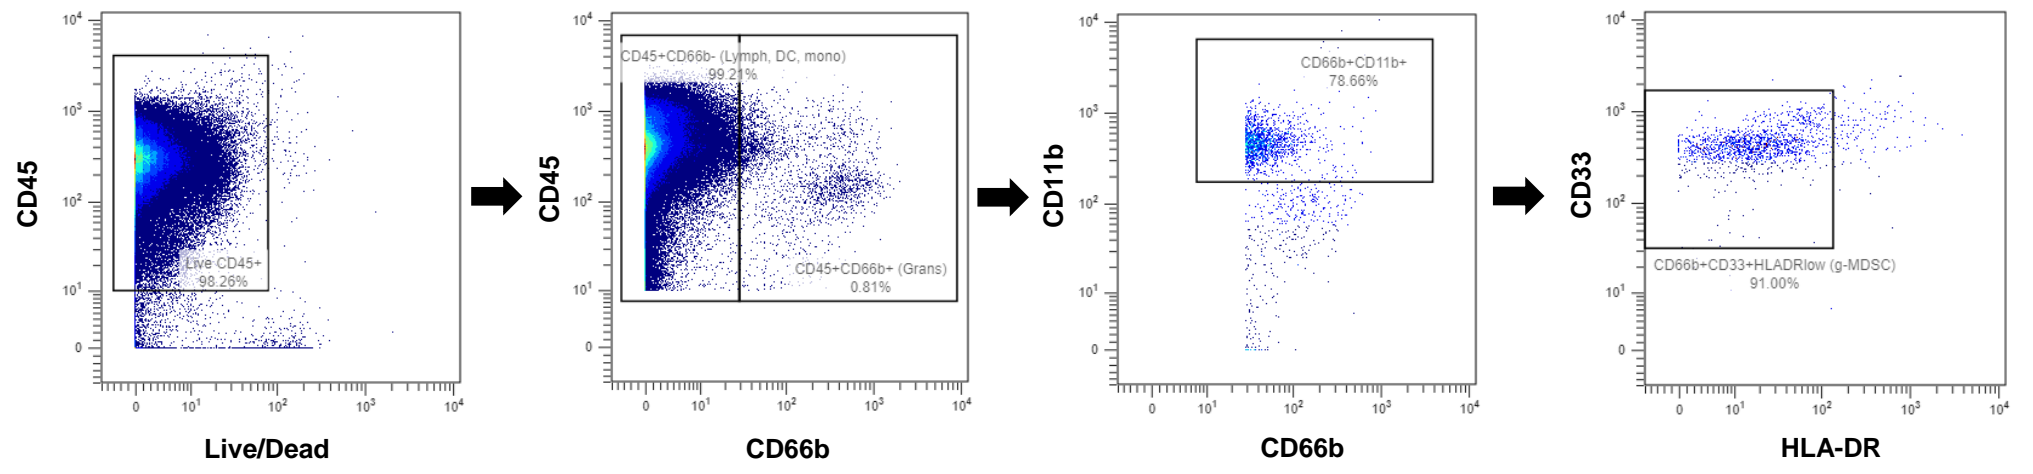**B**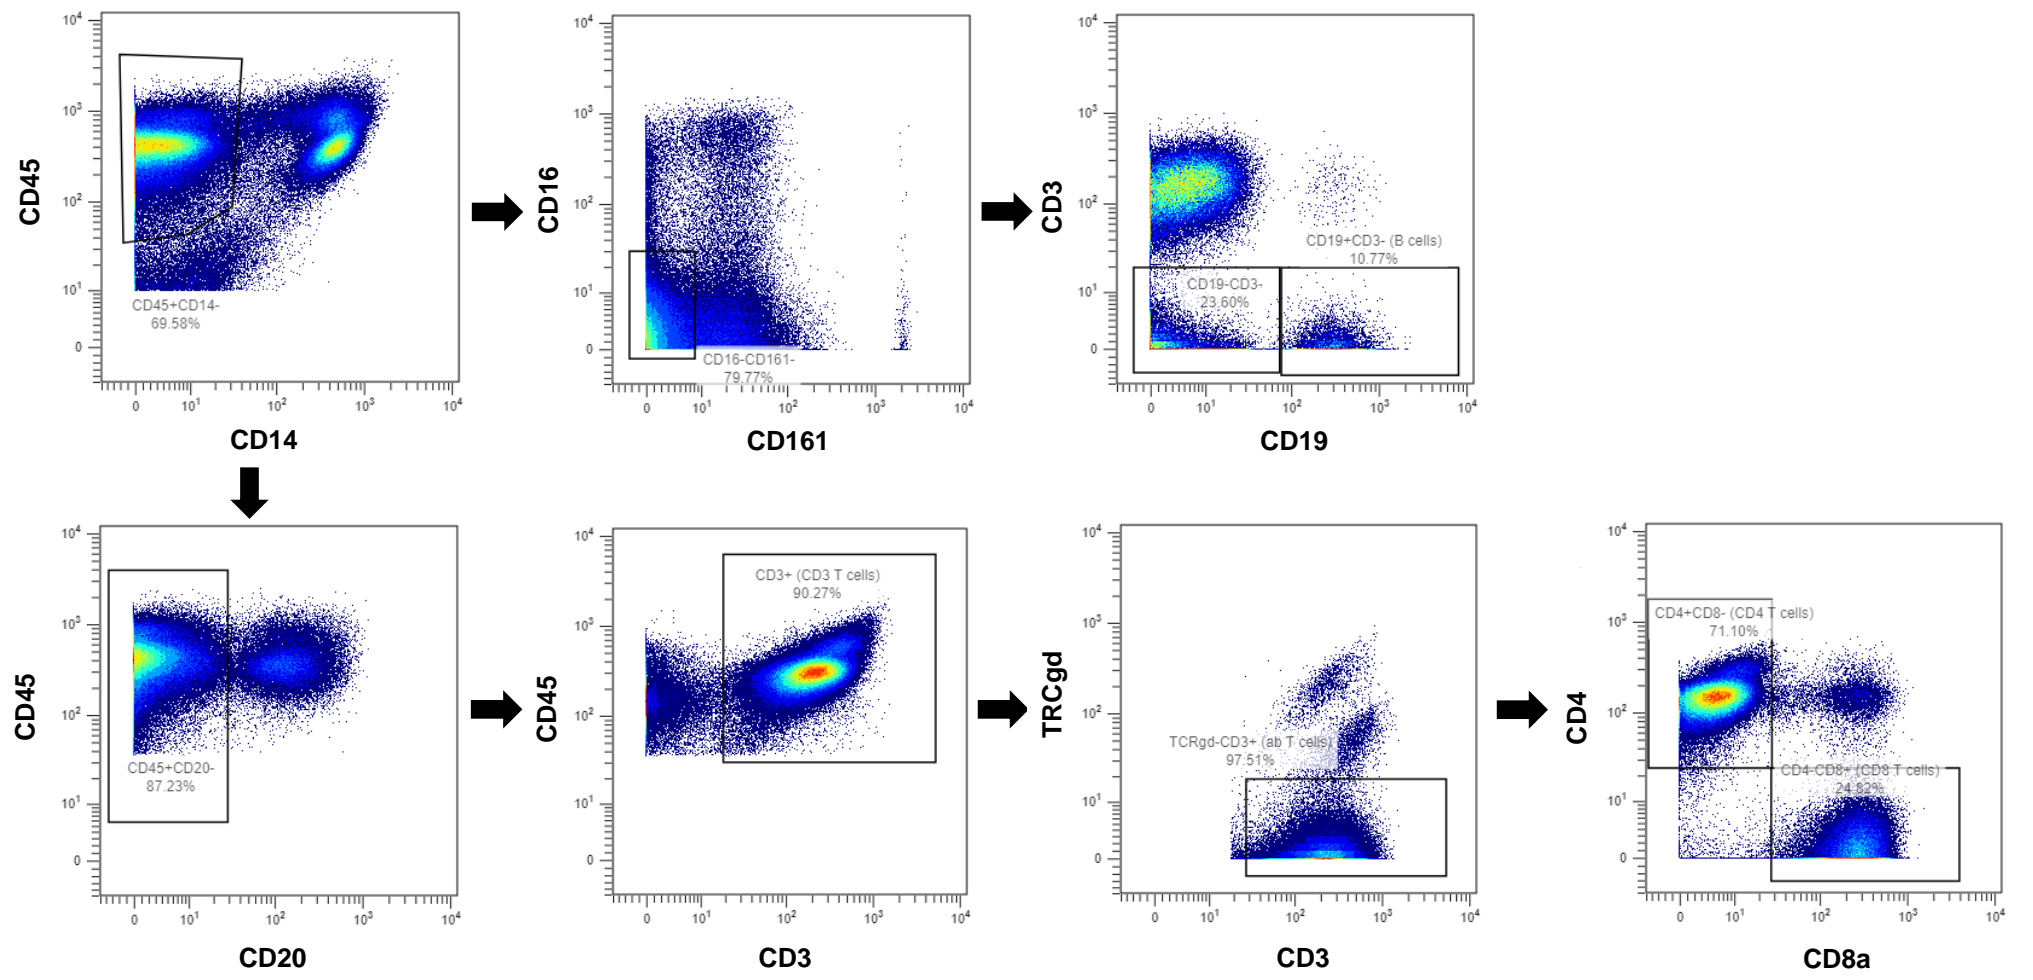**C**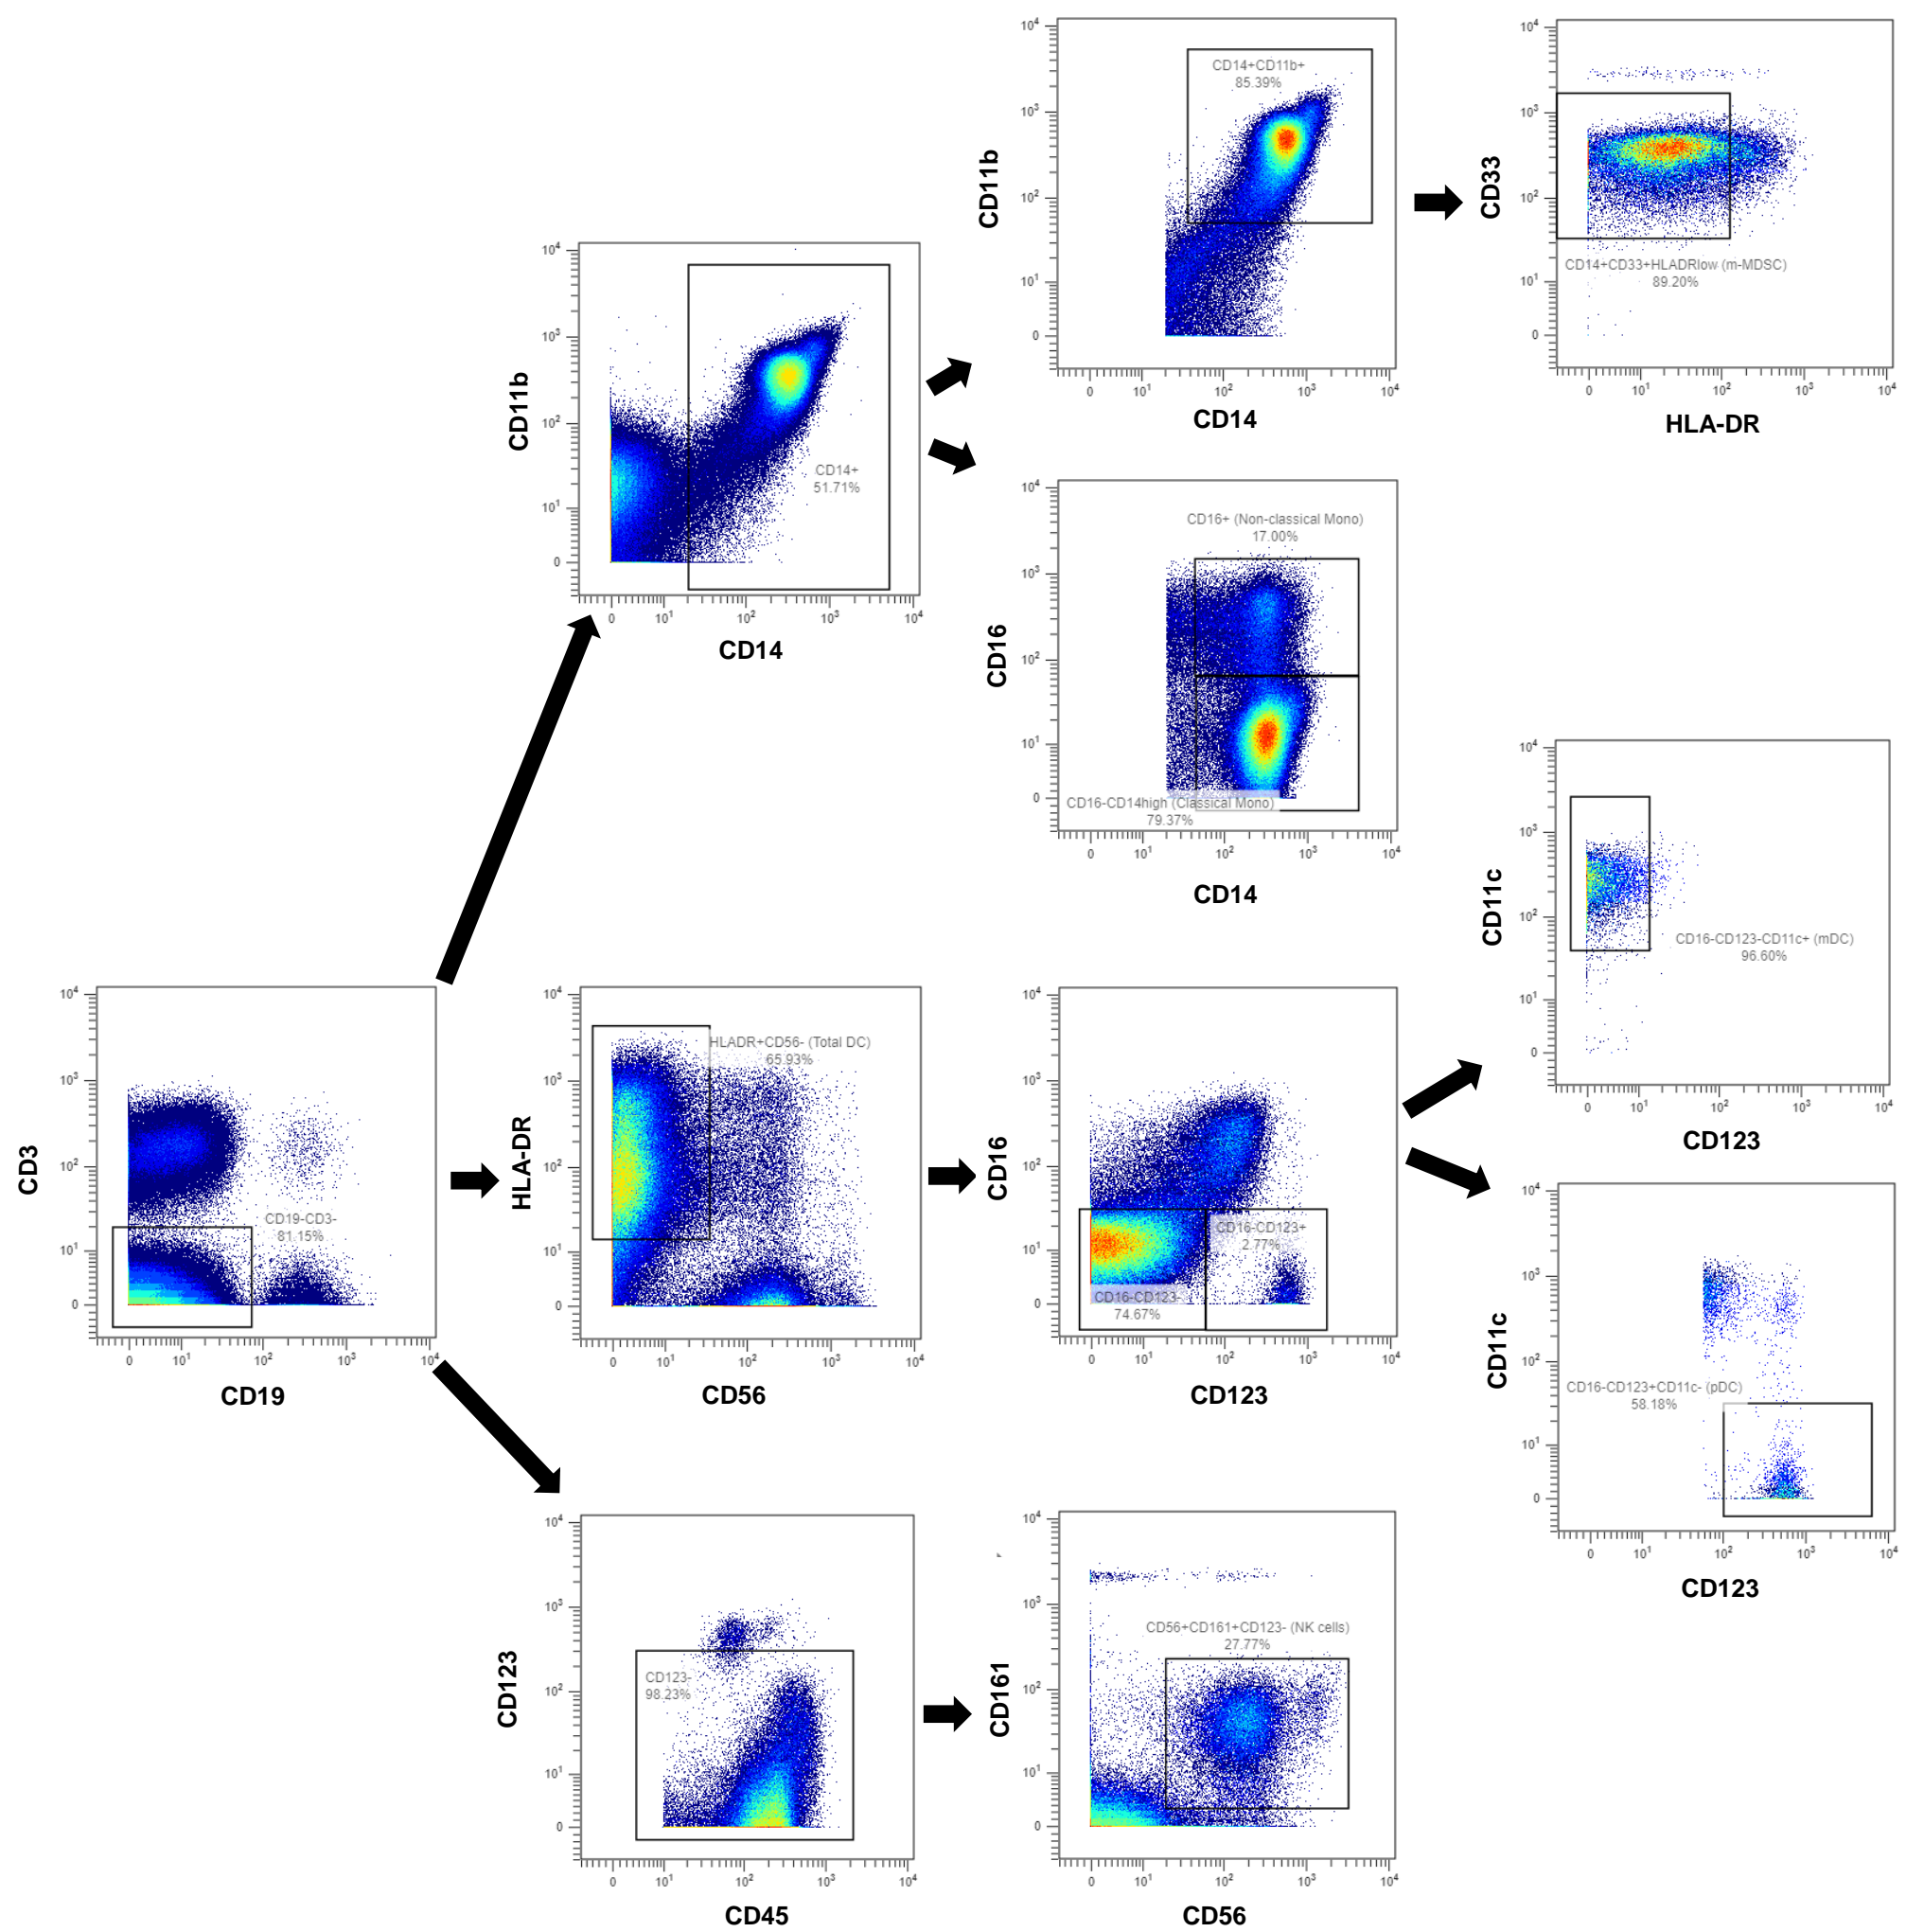

**Supplemental Figure 2: Representative gating strategy on patient PBMCs.** **A** Representative gating strategy for CD66b+ CD11b+ granulocytes and CD66b+ CD33+ HLADR<sup>low</sup> g-MDSCs. **B** Representative gating strategy for CD19+CD3- B cells, CD8+ T cells, and CD4+ T cells. CD45+ CD14- cells gated off the CD45+ CD66b- population. **C** Representative gating strategy for CD14+ monocytes (CD16- classical and CD16+ nonclassical), CD14+ CD33+ HLADR<sup>low</sup> m-MDSCs, CD16- CD123+ CD11c- pDCs, CD16- CD123- CD11c+ mDCs, and CD56+ CD161+ CD123- NK cells. CD19- CD3- cells gated off the CD45+ CD66b- population.

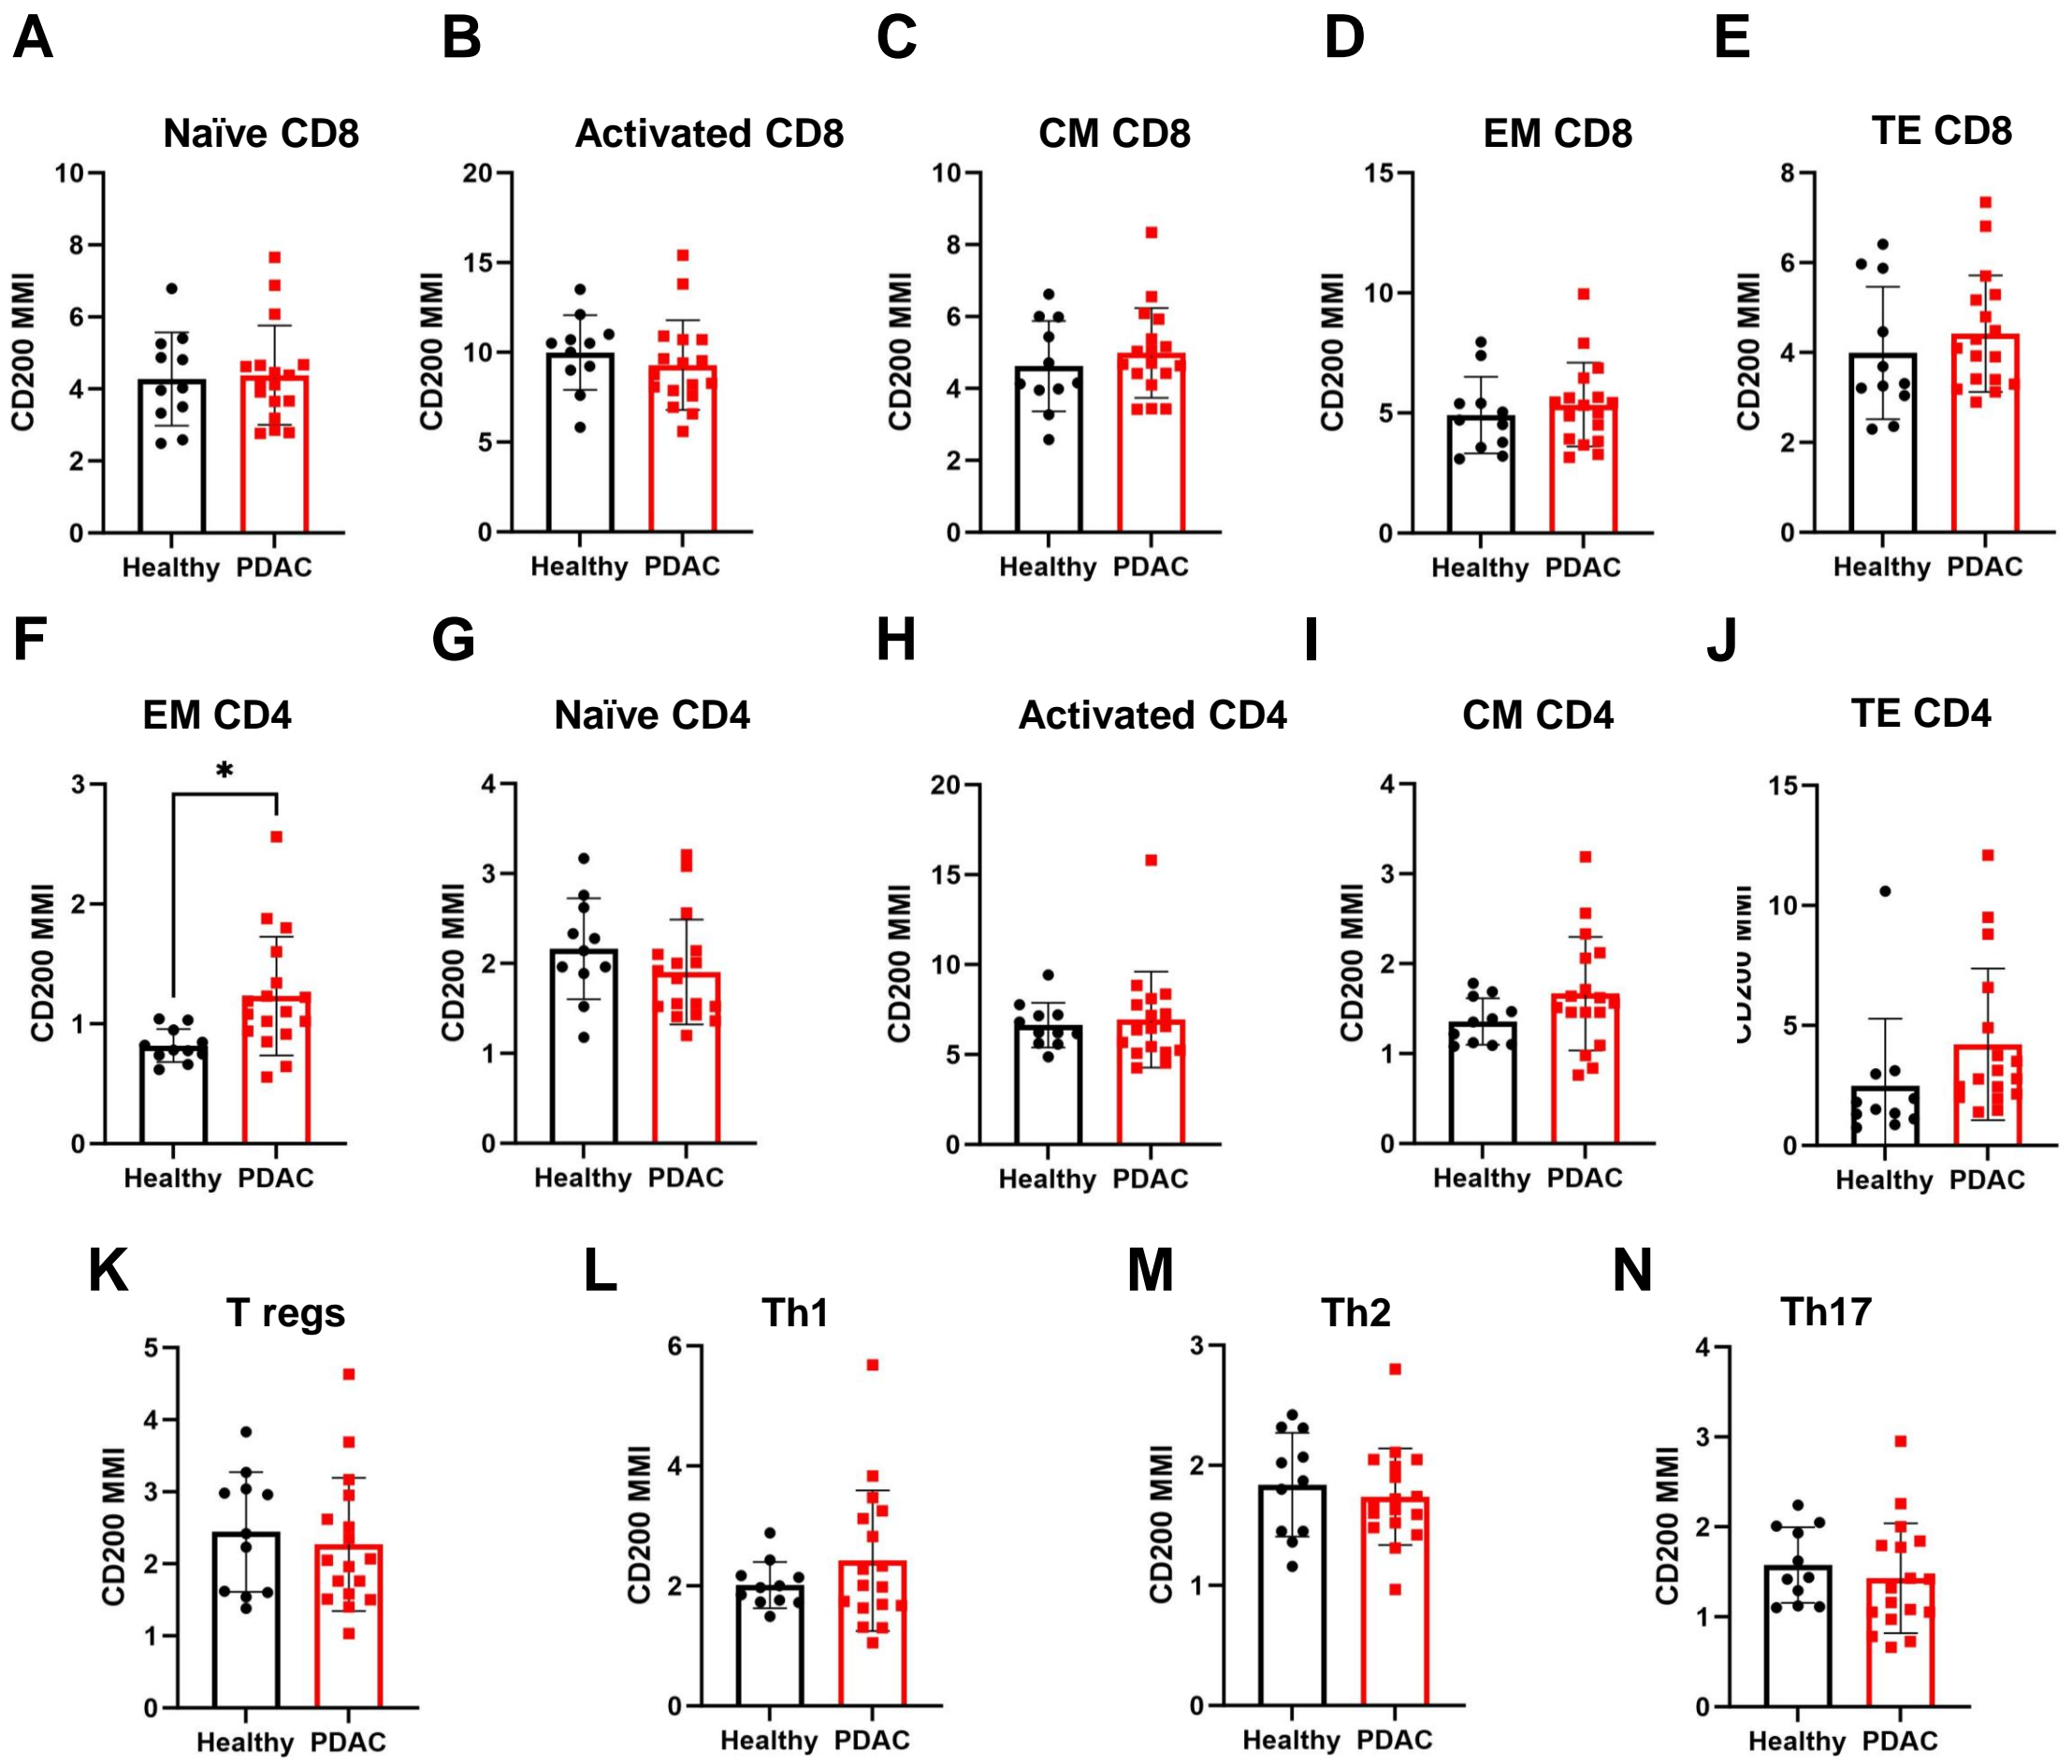

**Supplemental Figure 3: CD200 expression on specific T cell populations.** PBMCs were isolated from PDAC patients (n = 17) and healthy donors (n = 12) and stained with a panel of 38 antibodies for CyTOF. MMI of CD200 was quantified on **A** naïve, **B** activated, **C** CM, **D** EM, and **E** TE CD8 T cells. MMI of CD200 on **F** EM, **G** naïve, **H** activated, **I** CM, **J** TE CD4 T cells. MMI of CD200 on **K** T regs, **L** Th1, **M** Th2, and **N** Th17. Means  $\pm$  STD, \* =  $p < 0.05$

**Supplemental Table 1. Metal-isotope antibodies**

| <b>Marker</b>      | <b>Metal</b> |
|--------------------|--------------|
| CD45               | 89Y          |
| CD196/CCR6         | 141Pr        |
| CD123              | 143Nd        |
| CD19               | 144Nd        |
| CD4                | 145Nd        |
| CD8a               | 146Nd        |
| CD11c              | 147Sm        |
| CD16               | 148Nd        |
| CD45RO             | 149Sm        |
| CD45RA             | 150Nd        |
| CD161              | 151Eu        |
| CD194/CCR4         | 152Sm        |
| CD25               | 153Eu        |
| CD27               | 154Sm        |
| CD57               | 155Gd        |
| CD183/CXCR3        | 156Gd        |
| CD185/CXCR5        | 158Gd        |
| CD28               | 160Gd        |
| CD38               | 161Dy        |
| CD56/NCAM          | 163Dy        |
| TCR $\gamma\delta$ | 164Dy        |
| CD294              | 166Er        |
| CD197/CCR7         | 167Er        |
| CD14               | 168Er        |
| CD3                | 170Er        |
| CD20               | 171Yb        |
| CD66b              | 172Yb        |
| HLA-DR             | 173Yb        |
| IgD                | 174Yb        |
| CD127              | 176Yb        |
| CD11b/Mac-1        | 209Bi        |
| CD33               | 165Ho        |
| Viability          | 103Rh        |

**Supplemental Table 2. Characteristics of Patients**

|              | <b>Tissue Diagnosis</b> | <i>Normal</i> | <i>Cancer Adjacent</i> | <i>Pancreatic Cancer</i> |
|--------------|-------------------------|---------------|------------------------|--------------------------|
| <b>Total</b> |                         | 18            | 27                     | 127                      |
| <b>Sex</b>   | <i>Female</i>           | 8             | 15                     | 53                       |
|              | <i>Male</i>             | 10            | 12                     | 74                       |
| <b>Age</b>   | <i>&lt; 53 yrs</i>      | 18            | 11                     | 62                       |
|              | <i>&gt; 53 yrs</i>      | 0             | 16                     | 65                       |
| <b>Grade</b> | <i>1</i>                | -             | -                      | 32                       |
|              | <i>2</i>                | -             | -                      | 31                       |
|              | <i>3</i>                | -             | -                      | 37                       |
| <b>Stage</b> | <i>I</i>                | -             | -                      | 48                       |
|              | <i>II</i>               | -             | -                      | 71                       |
|              | <i>III/IV</i>           | -             | -                      | 6                        |

**Supplemental Table 3. Genetic identification of iCAFs vs myCAFs**

| iCAFs   | myCAFs  |
|---------|---------|
| C3      | MYL9    |
| DUSP1   | CALD1   |
| FBLN1   | MMP11   |
| LMNA    | HOPX    |
| CLU     | BGN     |
| CCDC80  | IGFBP7  |
| MYC     | TPM2    |
| EFEMP1  | CTHRC1  |
| HAS1    | ACTA2   |
| NR4A1   | TAGLN   |
| CFD     | INHBA   |
| ANXA1   | COL10A1 |
| CXCL12  | TPM1    |
| FGF7    | POSTN   |
| KLF4    | GRP     |
| EMP1    | CST1    |
| GPRC5A  |         |
| SRPX    |         |
| MT2A    |         |
| MEDAG   |         |
| IGF1    |         |
| MGST1   |         |
| MCL1    |         |
| CEBPD   |         |
| S100A10 |         |
| UAP1    |         |
| TNXB    |         |
| CEBPB   |         |
| PNRC1   |         |
| SOCS3   |         |
| PTGDS   |         |
| FOSB    |         |
| NFKBIA  |         |
| CXCL2   |         |
| THBS1   |         |
| CCL2    |         |
| OGN     |         |
| GSN     |         |
| DPT     |         |
| PLA2G2A |         |
| NAMPT   |         |
| ITM2A   |         |
| RGCC    |         |
| JUND    |         |
| NNMT    |         |
| ZFP36   |         |
| PIM1    |         |
| CPE     |         |
| GFPT2   |         |
| SOD2    |         |
| KDM6B   |         |
| FSTL1   |         |
| FBLN2   |         |
| NR4A3   |         |
| MFAP5   |         |
| ABL2    |         |
| SGK1    |         |
| CILP    |         |
| UGDH    |         |
| FBLN5   |         |
| ADAMTS1 |         |
| ADH1B   |         |
| WISP2   |         |
| GPX3    |         |
| S100A4  |         |
| IL6     |         |
| HAS2    |         |
| PLAC9   |         |
| IGFBP6  |         |
| FBN1    |         |
| BDKRB1  |         |
| TPPP3   |         |
| RASD1   |         |
| MT1A    |         |
| CXCL14  |         |
| PI16    |         |
| APOE    |         |
| IL8     |         |
| ARC     |         |
| PTX3    |         |
| TNFAIP6 |         |
| MT1E    |         |
| MT1X    |         |
| CXCL1   |         |
